# Supplementary material
Source: Research Square preprint supplement (doi:10.21203/rs.3.rs-9519255/v1)
Supplement: Supplementary file 1 [file 9017286804689bd9cd6e5a4f.docx]

**Supplemental Document**

**Summary of Exploratory Factor Analysis**

To determine if survey items measured concepts about healthy balance, staying safe, bystander behavior, and general teen dating violence, an exploratory factor analysis (EFA) was conducted. The sampling adequacy was evaluated with the Kaiser-Meyer-Olkin (KMO) index. It demonstrated poor sampling adequacy with an index of .09 (Table S1). Exploratory factor analyses (EFA) were employed to examine how these items hung together and determined it would be appropriate to examine TDV constructs of balance, staying safe, and bystander behaviors separately. These analyses included the items measuring participant perception of behavior to identify any additional concepts. We used parallel analysis, eigenvalues over 1, meaningful/salient loadings (.35 and above), and based on the analyses on polychoric correlation to identify the number of factors with various rotations applied. Overall, the number of factors varied considerably from 3-6. One consistent pattern was that the concepts of balance, staying safe, and bystander behaviors loaded on separate factors, with various other clusters. However, as shown in Table S2, the number of correct responses was very high for all but one of the six other items in the measure. This item was not included in the current study due to the uniqueness of that result. Balance, staying safe, and bystander behaviors were rated correctly at lower rates. Given the distribution of correct answers and the low coefficient alpha, we determined that it was reasonable to treat balance, staying safe, and bystander behaviors as separate concepts for the study. To examine these further, we examined the balance, staying safe, and bystander behavior re-coded items separately and together as a composite variable to represent overall TDV knowledge. Again, we also identified that two of the items measuring perception of behavior consistently loaded on the same factor across analyses. In conclusion, the rate of correct responses at pre- and post-surveys was extremely high for most of these items (Table S2); thus, it did not seem reasonable to include these items in the further correlational analyses, given that there was almost no variability.

As noted, a series of exploratory factor analyses (EFA) were employed to examine how the items hung together and if it would be appropriate to examine TDV constructs of balance, staying safe, and bystander behaviors separately. These analyses included the items measuring participant perception of behavior to identify any additional concepts. We used parallel analysis, eigenvalues over 1, meaningful/salient loadings (.35 and above), and based on polychoric correlation to identify the number of factors with various rotations applied (e.g., principal axis factoring with a Promax rotation, varimax rotation, etc.). Overall, the number of factors varied considerably from 3-6. One consistent pattern was that the concepts of balance, staying safe, and bystander behaviors loaded separately, with various other items clustering.

As one example, five factors were extracted based on a parallel analysis and polychoric correlation, accounting for 71.0% of the variance. The eigenvalue and the percent of variance explained by each factor (Unrotated solution proportion variance) of each factor are provided in Table S4. After applying a Promax rotation, the cumulative variance remained at 71.0% (Table S4). For the current study, these findings confirmed the justification of analyzing the TDV concepts of healthy balance, staying safe, and bystander behaviors separately, as these concepts loaded onto three separate factors (Table S5).

The results of this factor analysis also indicated that some items measuring participant perceptions of behavior loaded onto integrated factors, while others did not load well onto integrated factors. For example, items measuring more extreme and unhealthy behaviors that are commonly associated with TDV (i.e., *Your partner threatens to hurt themselves if you were to break up with them,* and *Your partner shows a naked photo of you to their friends*) were found to uniquely load on Factor 1 (Table S5). Yet, other items that did not exhibit scenarios commonly viewed as TDV (i.e., *Your partner makes you share your location with them even though you don’t think it’s necessary*, *You and your partner can share things with each other and keep some things private*, and *Your partner has you skip hanging out with friends to spend time with them*) loaded uniquely on separate factors.

*Table S1. Kaiser-Meyer-Olkin Test for Sampling Adequacy*

|  | Measure of Sampling Adequacy (MSA) |
| --- | --- |
| Overall MSA | .09 |
| Share location | .08 |
| Keep some things private | .01 |
| Self-harm | .19 |
| Skip hanging out with friends | .14 |
| Hurtful name | .03 |
| Intimate photo | .18 |
| Healthy balance | .03 |
| Staying safe | .03 |
| Bystander behavior | .04 |

*Table S2. Factor Characteristics*

|  | Factor 1 | Factor 2 | Factor 3 | Factor 4 | Factor 5 |
| --- | --- | --- | --- | --- | --- |
| Eigenvalues | 3.05 | 1.67 | 1.18 | .97 | .80 |
| Unrotated Solution |  |  |  |  |  |
| Sum of Square Loadings | 3.03 | 1.51 | .71 | .59 | .55 |
| Proportion variance | .34 | .17 | .08 | .07 | .06 |
| Cumulative | .34 | .50 | .58 | .65 | .71 |
| Rotated Solution |  |  |  |  |  |
| Sum of Square Loadings | 2.62 | 1.36 | .98 | .79 | .64 |
| Proportion variance | .29 | .15 | .11 | .09 | .07 |
| Cumulative | .29 | .44 | .55 | .64 | .71 |

*Table S3. Factor Loadings*

|  | Factor 1 | Factor 2 | Factor 3 | Factor 4 | Factor 5 | Uniqueness |
| --- | --- | --- | --- | --- | --- | --- |
| Intimate photo | 1.25 |  |  |  |  | -.34 |
| Self-harm | .74 |  |  |  |  | .09 |
| Skip hanging out with friends | .68 |  |  | .43 |  | .15 |
| Staying safe |  | 1.23 |  |  |  | -.21 |
| Share location |  |  | .86 |  |  | .28 |
| Bystander behavior |  |  |  | .48 |  | .74 |
| Keep some things private |  |  |  |  | .77 | .46 |
| Hurtful name |  |  |  |  |  | .72 |
| Healthy balance |  |  |  |  |  | .73 |
